# Supplementary material for: Association of CRP Genetic Variation and CRP Level With Elevated PTSD Symptoms and Physiological Responses in a Civilian Population With High Levels of Trauma
Source: Atypon-hosted journal article supplement (doi:10.1176/appi.ajp.2014.14020263), 2014-12-17

**TABLE S1. Maximum  $r^2$  in our sample traumatized individuals between each *CRP* SNP**

| Table S2    | rs3093068_G | rs1205_T | rs3093067_C | rs1130864_T | rs3093066_A | rs3091244_C |
|-------------|-------------|----------|-------------|-------------|-------------|-------------|
| rs3093068_G | 1           | 0.125    | 0.012       | 0.009       | 0.028       | 0.189       |
| rs1205_T    | 0.125       | 1        | 0.021       | 0.061       | 0.081       | 0.355       |
| rs3093067_C | 0.012       | 0.021    | 1           | 0.122       | >0.001      | 0.043       |
| rs1130864_T | 0.009       | 0.061    | 0.122       | 1           | 0.093       | 0.056       |
| rs3093066_A | 0.028       | 0.081    | >0.001      | 0.093       | 1           | 0.206       |
| rs3091244_C | 0.189       | 0.355    | 0.043       | 0.056       | 0.206       | 1           |

### Supplemental Material – Additive Model Results

Using an additive model, the SNP *rs1130864* was marginally associated with overall PTSD symptoms (N=2692,  $t=1.24$ ,  $p=0.009$ ; Table S1) and significantly associated with CRP levels (N=137,  $t=3.73$ ,  $p=0.0003$ ; Table S2 and Figure S1).

**TABLE S2. Main additive effects of *CRP* SNPs on PTSD symptoms and CRP peptide levels**

| <i>CRP</i> SNP          | PTSD symptoms |             |              | CRP peptide levels |             |               |
|-------------------------|---------------|-------------|--------------|--------------------|-------------|---------------|
|                         | n             | t           | p-value      | n                  | t           | p-value       |
| <i>rs1205</i>           | 2692          | -0.01       | 0.99         | 137                | -0.88       | 0.38          |
| <b><i>rs1130864</i></b> | <b>2692</b>   | <b>2.63</b> | <b>0.009</b> | 137                | <b>3.73</b> | <b>0.0003</b> |
| <i>rs3091244</i>        | 2686          | 0.23        | 0.82         | 137                | -2.68       | 0.008         |
| <i>rs3093066</i>        | 2691          | 0.54        | 0.59         | 137                | -1.95       | 0.05          |
| <i>rs3093067</i>        | 2692          | 1.03        | 0.31         | 137                | 0.55        | 0.59          |
| <i>rs3093068</i>        | 2686          | -2.47       | 0.01         | 137                | 1.18        | 0.24          |

**FIGURE S1. (A) Mean  $\pm$  SD serum CRP levels in traumatized individuals of each *rs1130864* genotype (N=2692). (B) Mean  $\pm$  SD PTSD symptoms levels in traumatized individuals of each *rs1130864* genotype (N=137).**

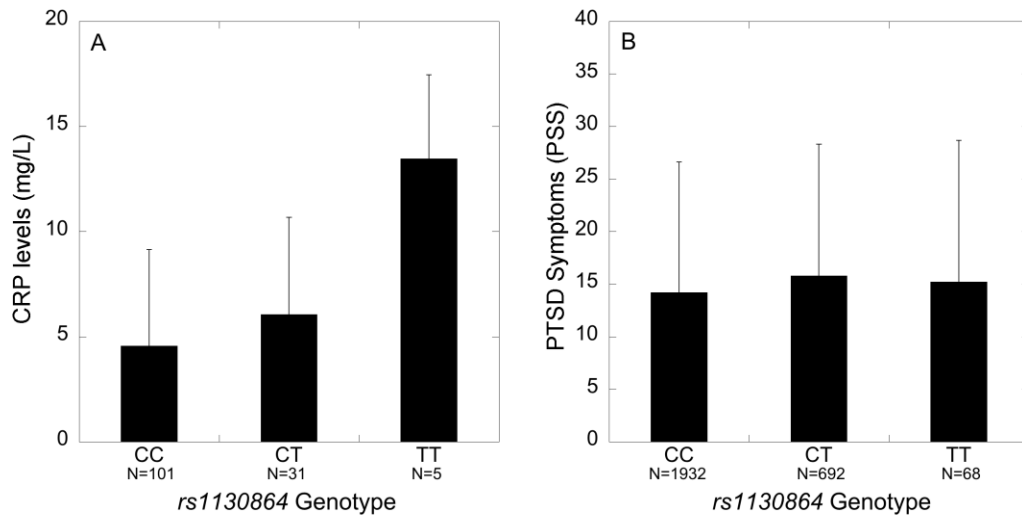

Supplement: appi.ajp.2014.14020263.ds001.pdf [file appi.ajp.2014.14020263.ds001.pdf]
